CORRECTION

# Correction: *XRN1* Is a Species-Specific Virus Restriction Factor in Yeasts

The *PLOS Pathogens* Staff

## Notice of Republication

This article was republished on October 13, 2016 to correct errors that occurred during the typesetting process. The publisher apologizes for the errors. Please download this article again to view the correct version. The originally published, uncorrected article and the republished, corrected articles are provided here for reference.

## Supporting Information

**S1 File. Originally published, uncorrected article.**  
(PDF)

**S2 File. Republished, corrected article.**  
(PDF)

## Reference

1. Rowley PA, Ho B, Bushong S, Johnson A, Sawyer SL (2016) *XRN1* Is a Species-Specific Virus Restriction Factor in Yeasts. *PLoS Pathog* 12(10): e1005890. doi: [10.1371/journal.ppat.1005890](https://doi.org/10.1371/journal.ppat.1005890) PMID: [27711183](https://pubmed.ncbi.nlm.nih.gov/27711183/)

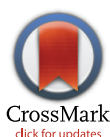

## OPEN ACCESS

**Citation:** The *PLOS Pathogens* Staff (2016) Correction: *XRN1* Is a Species-Specific Virus Restriction Factor in Yeasts. *PLoS Pathog* 12(10): e1006002. doi:[10.1371/journal.ppat.1006002](https://doi.org/10.1371/journal.ppat.1006002)

**Published:** October 28, 2016

**Copyright:** © 2016 The PLOS Pathogens Staff. This is an open access article distributed under the terms of the [Creative Commons Attribution License](https://creativecommons.org/licenses/by/4.0/), which permits unrestricted use, distribution, and reproduction in any medium, provided the original author and source are credited.
